# Supplementary material for: Two decades of in-situ temperature measurements in the upper troposphere and lowermost stratosphere from IAGOS long-term routine observation
Source: Copernicus journal article supplement (doi:10.5194/acp-2017-494), 2017-06-06
Supplement: Supplementary file [file Supplement_ACPD_Florian_Berkes_reviewed.pdf › Supplement_ACPD_Florian_Berkes_reviewed.pdf]

**Table S1: Temperature in the LMS between 1995 and 2012, averaged over seasons and regions. The numbers correspond to the 1-minute mean data.**

| Season | Region            | Mean±stdev<br>in K | Median<br>in K | Number<br>*1000 | Season | Region               | Mean±stdev<br>in K | Median<br>in K | Number<br>*1000 |
|--------|-------------------|--------------------|----------------|-----------------|--------|----------------------|--------------------|----------------|-----------------|
| MAM    | North<br>Canada   | 222.2±4.3          | 222.8          | 42              | MAM    | Greenland            | 223.3±3.3          | 223.4          | 78              |
| JJA    |                   | 226.1±2.1          | 225.8          | 28              | JJA    |                      | 226.9±1.7          | 226.8          | 80              |
| SON    |                   | 221.6±3.0          | 221.8          | 44              | SON    |                      | 223.3±2.6          | 223.7          | 81              |
| DJF    |                   | 218.4±4.2          | 218.2          | 73              | DJF    |                      | 218.0±3.4          | 218.1          | 100             |
| MAM    | Scandinavia       | 221.9±3.8          | 221.3          | 28              | MAM    | North<br>Asia        | 220.2±4.5          | 221.1          | 122             |
| JJA    |                   | 226.0±2.1          | 226.1          | 22              | JJA    |                      | 227.3±1.6          | 227.6          | 94              |
| SON    |                   | 221.3±2.5          | 221.8          | 23              | SON    |                      | 219.8±2.7          | 220.2          | 103             |
| DJF    |                   | 216.4±2.6          | 216.6          | 20              | DJF    |                      | 214.0±1.9          | 213.8          | 82              |
| MAM    | North<br>America  | 222.8±1.9          | 222.8          | 145             | MAM    | North<br>Atlantic    | 223.3±1.8          | 223.6          | 374             |
| JJA    |                   | 225.2±1.2          | 225.3          | 81              | JJA    |                      | 226.4±0.9          | 226.3          | 309             |
| SON    |                   | 223.2±2.1          | 223.5          | 107             | SON    |                      | 224.6±1.9          | 224.4          | 291             |
| DJF    |                   | 221.6±1.9          | 221.3          | 185             | DJF    |                      | 221.2±1.6          | 221.2          | 342             |
| MAM    | Europe            | 219.9±1.9          | 220.1          | 283             | MAM    | Central<br>Asia      | 219.8±2.5          | 220.0          | 199             |
| JJA    |                   | 224.8±1.6          | 224.7          | 209             | JJA    |                      | 226.2±1.3          | 226.4          | 81              |
| SON    |                   | 220.8±2.1          | 220.4          | 183             | SON    |                      | 220.6±2.2          | 220.5          | 129             |
| DJF    |                   | 218.1±1.7          | 217.9          | 252             | DJF    |                      | 217.9±2.5          | 217.4          | 184             |
| MAM    | Middle<br>America | -                  | -              | 0               | MAM    | Tropical<br>Atlantic | -                  | -              | 0               |
| JJA    |                   | -                  | -              | 0               | JJA    |                      | -                  | -              | 0               |
| SON    |                   | -                  | -              | 0               | SON    |                      | -                  | -              | 0               |
| DJF    |                   | -                  | -              | 0               | DJF    |                      | -                  | -              | 0               |
| MAM    | North<br>Africa   | -                  | -              | 0               | MAM    | Tropical<br>Asia     | -                  | -              | 0               |
| JJA    |                   | -                  | -              | 0               | JJA    |                      | -                  | -              | 0               |
| SON    |                   | -                  | -              | 0               | SON    |                      | -                  | -              | 0               |
| DJF    |                   | -                  | -              | 0               | DJF    |                      | -                  | -              | 0               |
| MAM    | South<br>America  | -                  | -              | 0               | MAM    | South<br>Africa      | -                  | -              | 0               |
| JJA    |                   | -                  | -              | 0               | JJA    |                      | -                  | -              | 0               |
| SON    |                   | -                  | -              | 0               | SON    |                      | -                  | -              | 0               |
| DJF    |                   | -                  | -              | 0               | DJF    |                      | -                  | -              | 0               |

**Table S2: Temperature in the TPL between 1995 and 2012, averaged over seasons and regions. The numbers correspond to the 1-minute mean data.**

| Season | Region            | Mean±stdev<br>in K | Median<br>in K | Number<br>*1000 | Season | Region               | Mean±stdev<br>in K | Median<br>in K | Number<br>*1000 |
|--------|-------------------|--------------------|----------------|-----------------|--------|----------------------|--------------------|----------------|-----------------|
| MAM    | North<br>Canada   | 214.1±2.0          | 214.5          | 3               | MAM    | Greenland            | 214.1±2.5          | 214.4          | 16              |
| JJA    |                   | 218.5±1.4          | 218.2          | 8               | JJA    |                      | 219.7±1.1          | 219.6          | 30              |
| SON    |                   | 215.9±2.3          | 216.5          | 4               | SON    |                      | 216.5±2.7          | 217            | 20              |
| DJF    |                   | 209.8±1.4          | 210            | 6               | DJF    |                      | 210.6±2.3          | 210.6          | 23              |
| MAM    | Scandinavia       | 213.6±3.9          | 215.4          | 2               | MAM    | North<br>Asia        | 212.4±3.3          | 212.6          | 26              |
| JJA    |                   | 218.9±1.9          | 218.8          | 7               | JJA    |                      | 219.2±1.3          | 219.1          | 54              |
| SON    |                   | 215.5±2.7          | 215.4          | 4               | SON    |                      | 213.3±2.3          | 213.5          | 34              |
| DJF    |                   | 209.6±2.0          | 210.1          | 3               | DJF    |                      | 208.4±1.8          | 208.5          | 17              |
| MAM    | North<br>America  | 215.4±1.7          | 215.3          | 64              | MAM    | North<br>Atlantic    | 214.3±1.7          | 214.4          | 197             |
| JJA    |                   | 219.3±1.4          | 219.3          | 61              | JJA    |                      | 219.2±1.2          | 219.4          | 229             |
| SON    |                   | 217.2±1.9          | 217.4          | 53              | SON    |                      | 216.9±1.9          | 217            | 453             |
| DJF    |                   | 214.4±1.6          | 214.4          | 54              | DJF    |                      | 212.4±1.4          | 212.2          | 136             |
| MAM    | Europe            | 214.2±1.5          | 214.4          | 168             | MAM    | Central<br>Asia      | 214.4±2.0          | 214.4          | 113             |
| JJA    |                   | 219.4±1.5          | 219.4          | 163             | JJA    |                      | 219.4±1.5          | 219.4          | 103             |
| SON    |                   | 215.3±1.9          | 215.2          | 148             | SON    |                      | 214.9±2.0          | 215.3          | 92              |
| DJF    |                   | 212.5±1.4          | 212.4          | 130             | DJF    |                      | 212.7±2.4          | 212.6          | 61              |
| MAM    | Middle<br>America | -                  | -              | 0               | MAM    | Tropical<br>Atlantic | -                  | -              | 0               |
| JJA    |                   | -                  | -              | 0               | JJA    |                      | -                  | -              | 0               |
| SON    |                   | -                  | -              | 0               | SON    |                      | -                  | -              | 0               |
| DJF    |                   | -                  | -              | 0               | DJF    |                      | -                  | -              | 0               |
| MAM    | North<br>Africa   | -                  | -              | 0               | MAM    | Tropical<br>Asia     | -                  | -              | 0               |
| JJA    |                   | -                  | -              | 0               | JJA    |                      | -                  | -              | 0               |
| SON    |                   | -                  | -              | 0               | SON    |                      | -                  | -              | 0               |
| DJF    |                   | -                  | -              | 0               | DJF    |                      | -                  | -              | 0               |
| MAM    | South<br>America  | -                  | -              | 0               | MAM    | South<br>Africa      | -                  | -              | 0               |
| JJA    |                   | -                  | -              | 0               | JJA    |                      | -                  | -              | 0               |
| SON    |                   | -                  | -              | 0               | SON    |                      | -                  | -              | 0               |
| DJF    |                   | -                  | -              | 0               | DJF    |                      | -                  | -              | 0               |

**Table S3: Temperature in the UT between 1995 and 2012, averaged over seasons and regions. The numbers correspond to the 1-minute mean data.**

| Season | Region            | Mean±stdev<br>in K | Median<br>in K | Number<br>*1000 | Season | Region               | Mean±stdev<br>in K | Median<br>in K | Number<br>*1000 |
|--------|-------------------|--------------------|----------------|-----------------|--------|----------------------|--------------------|----------------|-----------------|
| MAM    | North<br>Canada   | 217.2±3.1          | 218.5          | 1               | MAM    | Greenland            | 215.5±3.2          | 216.1          | 8               |
| JJA    |                   | 222.5±1.6          | 221.9          | 2               | JJA    |                      | 222.1±1.4          | 221.9          | 13              |
| SON    |                   | 219.6±1.7          | 219.4          | 1               | SON    |                      | 219.6±3.1          | 220.1          | 15              |
| DJF    |                   | 210.0±3.2          | 209.5          | 1               | DJF    |                      | 212.1±1.9          | 212.3          | 22              |
| MAM    | Scandinavia       | 216.3±3.5          | 217            | 2               | MAM    | North<br>Asia        | 214.6±4.1          | 214.4          | 11              |
| JJA    |                   | 223.8±1.6          | 223.4          | 7               | JJA    |                      | 222.3±1.7          | 222.4          | 32              |
| SON    |                   | 219.2±2.8          | 219.5          | 7               | SON    |                      | 216.6±3.2          | 216.8          | 19              |
| DJF    |                   | 213.5±1.7          | 213.6          | 5               | DJF    |                      | 209.4±2.3          | 209.3          | 9               |
| MAM    | North<br>America  | 221.4±1.7          | 221.3          | 136             | MAM    | North<br>Atlantic    | 217.5±1.9          | 217.5          | 229             |
| JJA    |                   | 226.3±1.3          | 226.5          | 263             | JJA    |                      | 222.9±1.5          | 222.9          | 399             |
| SON    |                   | 223.6±2.2          | 224            | 190             | SON    |                      | 220.9±2.3          | 220.7          | 381             |
| DJF    |                   | 220.3±1.8          | 220.4          | 76              | DJF    |                      | 215.6±1.6          | 215.5          | 195             |
| MAM    | Europe            | 219.5±1.6          | 219.7          | 246             | MAM    | Central<br>Asia      | 220.8±2.9          | 220.7          | 168             |
| JJA    |                   | 226.5±1.9          | 226.7          | 419             | JJA    |                      | 230.3±3.9          | 229.8          | 333             |
| SON    |                   | 221.6±2.3          | 221.3          | 383             | SON    |                      | 222.8±4.1          | 221.7          | 224             |
| DJF    |                   | 217.6±1.3          | 217.5          | 217             | DJF    |                      | 218.8±3.3          | 218.9          | 68              |
| MAM    | Middle<br>America | 229.1±4.6          | 228.5          | 6               | MAM    | Tropical<br>Atlantic | 226.0±2.3          | 225.6          | 109             |
| JJA    |                   | 228.2±5.1          | 227.9          | 3               | JJA    |                      | 227.6±2.4          | 228.1          | 86              |
| SON    |                   | 227.6±5.8          | 227.8          | 3               | SON    |                      | 226.0±2.5          | 226.2          | 87              |
| DJF    |                   | 229.7±4.5          | 229.2          | 7               | DJF    |                      | 225.5±2.6          | 225.9          | 98              |
| MAM    | North<br>Africa   | 227.3±2.6          | 227.1          | 170             | MAM    | Tropical<br>Asia     | 229.8±3.5          | 229.7          | 113             |
| JJA    |                   | 229.5±2.9          | 229.6          | 180             | JJA    |                      | 238.3±3.2          | 238.1          | 136             |
| SON    |                   | 226.9±2.7          | 226.3          | 184             | SON    |                      | 230.7±4.8          | 229.5          | 132             |
| DJF    |                   | 225.6±2.2          | 224.9          | 161             | DJF    |                      | 227.9±3.5          | 227.9          | 106             |
| MAM    | South<br>America  | 230.2±1.7          | 229.8          | 39              | MAM    | South<br>Africa      | 228.8±3.2          | 229.1          | 106             |
| JJA    |                   | 228.8±2.9          | 228.7          | 33              | JJA    |                      | 227.7±3.1          | 227.6          | 100             |
| SON    |                   | 228.8±2.5          | 229.2          | 28              | SON    |                      | 228.2±3.3          | 227.2          | 100             |
| DJF    |                   | 229.6±2.0          | 229.3          | 40              | DJF    |                      | 227.1±2.8          | 228.3          | 99              |

Table S4: Temperature trends of ERA-I and from the IAGOS observations within the LMS, TPL and UT as shown in table3 and compared to temperature trends derived from 17 years skipping the first (light gray) or last year (dark gray) in the analyses.

| Region         | ERA-I                      |             |                                   |                                  | IAGOS                      |             |                                   |                                  |
|----------------|----------------------------|-------------|-----------------------------------|----------------------------------|----------------------------|-------------|-----------------------------------|----------------------------------|
|                | $\Delta T_{18yr}$<br>K/dec | SE<br>K/dec | $\Delta T_{17yr, first}$<br>K/dec | $\Delta T_{17yr, last}$<br>K/dec | $\Delta T_{18yr}$<br>K/dec | SE<br>K/dec | $\Delta T_{17yr, first}$<br>K/dec | $\Delta T_{17yr, last}$<br>K/dec |
| <i>LMS</i>     |                            |             |                                   |                                  |                            |             |                                   |                                  |
| Greenland      | -0.79                      | 0.29        | -1.03                             | -0.83                            | -1.39                      | 0.29        | -1.48                             | -1.45                            |
| North America  | -0.25                      | 0.21        | -0.38                             | -0.21                            | -0.71                      | 0.21        | -0.73                             | -0.76                            |
| North Atlantic | +0.56                      | 0.17        | +0.53                             | +0.59                            | -0.05                      | 0.17        | +0.02                             | -0.01                            |
| Europe         | +0.11                      | 0.19        | +0.12                             | +0.14                            | -0.53                      | 0.20        | -0.49                             | -0.62                            |
| <i>TPL</i>     |                            |             |                                   |                                  |                            |             |                                   |                                  |
| North America  | +0.29                      | 0.19        | +0.11                             | +0.45                            | +0.23                      | 0.20        | -0.02                             | +0.42                            |
| North Atlantic | +0.46                      | 0.15        | +0.42                             | +0.62                            | +0.25                      | 0.16        | +0.20                             | +0.38                            |
| Europe         | +0.20                      | 0.15        | +0.17                             | +0.19                            | -0.44                      | 0.17        | -0.46                             | -0.57                            |
| <i>UT</i>      |                            |             |                                   |                                  |                            |             |                                   |                                  |
| North America  | -0.92                      | 0.17        | -0.99                             | -0.82                            | -1.08                      | 0.18        | -1.16                             | -1.00                            |
| North Atlantic | +0.38                      | 0.18        | +0.52                             | +0.58                            | +0.22                      | 0.20        | +0.33                             | +0.43                            |
| Europe         | -0.24                      | 0.14        | -0.21                             | -0.29                            | -0.59                      | 0.15        | -0.55                             | -0.71                            |
| Central Asia   | +0.66                      | 0.33        | +0.55                             | +0.91                            | +0.32                      | 0.33        | +0.27                             | +0.54                            |
| Tropical Asia  | -0.58                      | 0.39        | -0.43                             | -0.24                            | -0.54                      | 0.04        | -0.30                             | -0.21                            |
